# Supplementary material for: Quantifying Systemic Risk by Solutions of the Mean-Variance Risk Model
Source: PLOS journal article supplement (doi:10.1371/journal.pone.0158444), 2016-06-28
Supplement: S1 (10.1371/journal.pone.0158444.s001) [file journal.pone.0158444.s001]

# Supplementary: Quantifying systemic risk by mean-variance portfolio ground-states

JJ, AE, IM

May 24, 2016

In the article a uniform distribution of investors along the efficient frontier was assumed, in order to capture an average over the a general market. Yet, it is possible that  $\rho(\lambda)$  takes other forms. We study the case of  $\rho$  being a  $\delta$ -function around a certain value in Fig. (1). This would be the case when every investor is only interested in one risk-level  $\lambda$ . We tested for  $\lambda = 0\%, 1\%, 10\%, 50\%, 100\%$ . In general even one certain risk-level exhibits the distinctive peak when reweighing the portfolio takes place. It is also possible, that most of the investors are packed around a certain  $\lambda$ . In order to mimic that, we show in Fig. (2) the results of choosing  $\rho$  as a normal distribution centered around  $\mu_\lambda = 0\%, 10\%, 25\%, 50\%, 100\%$  and a standard deviation of  $\sigma_\lambda = 1/8$ . Choosing a broader distribution leads to values similar as in the uniform case.

As our parameters we set  $\omega$  to be 12 months, with  $\tau$  and  $\zeta$  equal to  $10^{-4}$  and restricting the investors to  $N_d = 5$  US indcies.

As a last step, we compare in Fig. (3) our early warning indicator to the indicator proposed by Zheng on our dataset. The sum of normalised eigenvalues  $\alpha_i$  is

$$\Lambda_k = \sum_{i=0}^k \alpha_i \quad (1)$$

where the normed eigenvalues  $\alpha_i$  are sorted in decreasing order. In order to capture between 85% and 95% of the market, we set  $k = 5$  and plot the changes in  $\Lambda_5$  normalised by the absolute maximum. The same was done with  $M$ . Comparing both indicators reveals, that the eigenvalues and the average investing strategy signal November 2007 as a critical date.

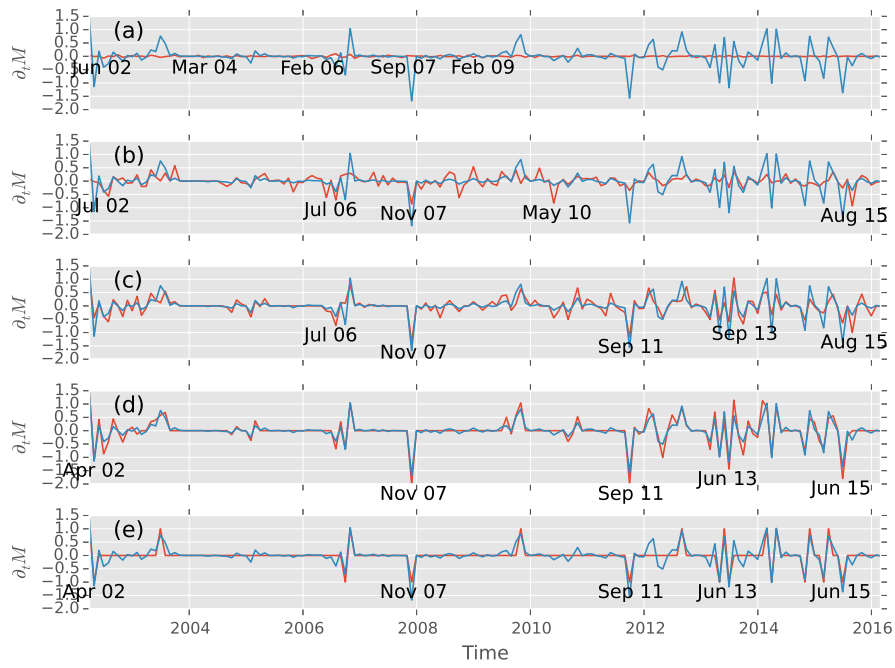

Figure 1: Time derivative of the investing strategy with  $\rho(\lambda) = \delta(\lambda - k)$  for different risk-levels: (a)  $\lambda = 0\%$  (b)  $\lambda = 1\%$  (c)  $\lambda = 10\%$  (d)  $\lambda = 50\%$  (e)  $\lambda = 100\%$ . In all risk-levels the distinct peak in November 2007 is present as well as the higher volatility after 2009.

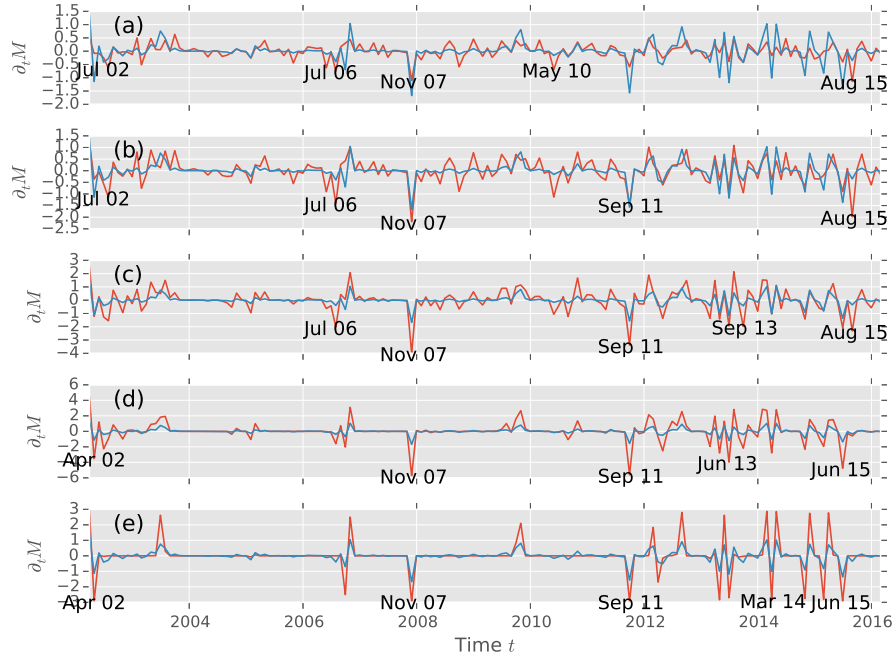

Figure 2: The time derivative of  $M$  with a normal distribution centered around different  $\lambda$ 's with a scaling factor of  $\sigma_\lambda = 1/8$ . In (a) only very risk aware investors are considered by setting  $\mu_\lambda = 0\%$ ; from (b) with  $\mu_\lambda = 10\%$ ; (c)  $\mu_\lambda = 25\%$ ; (d)  $\mu_\lambda = 50\%$  to (e) with  $\mu_\lambda = 100\%$  one can read the points in time where reshuffling is about to take place. Increasing  $\sigma_\lambda$  leads to similar distributions as a uniform density function.

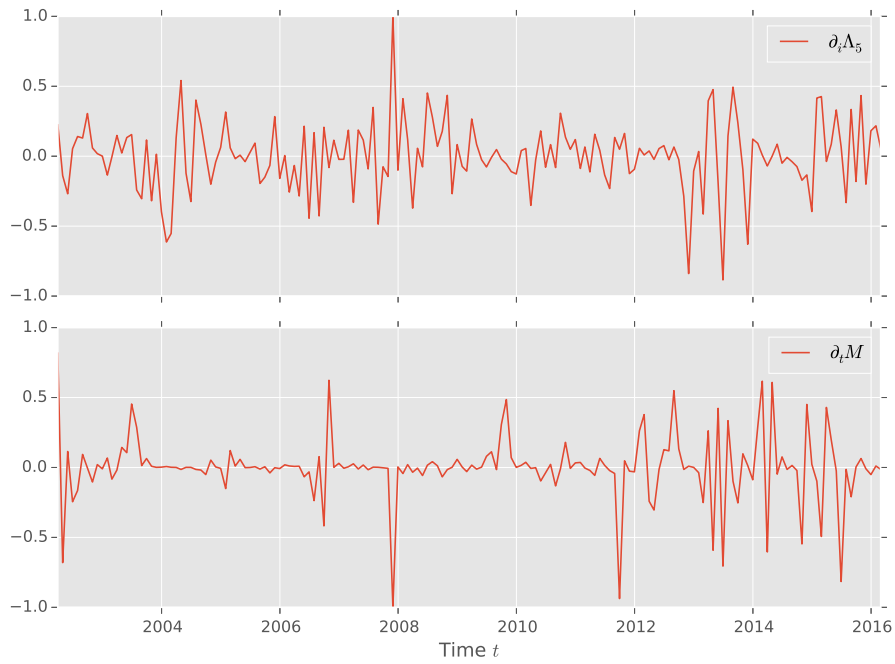

Figure 3: Comparison between the changes in the 5 largest eigenvalues (upper) with the average investing strategy (lower). The strongest increase in coupling happened in November 2007. This coincides with the steepest decrease of  $M$ . In order to explain between 85% and 95% of the data, the five greatest eigenvalues were chosen to calculate the changes in the cross-correlation matrix.
